# Supplementary material for: Non-targeted metabolomics and lipidomics LC–MS data from maternal plasma of 180 healthy pregnant women
Source: PubMed Central journal article supplement (PMC4391677; doi:10.1186/s13742-015-0054-9), 2015-04-09
Supplement: 13742_2015_54_MOESM1_ESM.pdf [file 13742_2015_54_MOESM1_ESM.pdf]

Batch 1Batch 2
